# Supplementary material for: Identification of Pathologic Grading-Related Genes Associated with Kidney Renal Clear Cell Carcinoma
Source: Hindawi journal article supplement (doi:10.1155/2022/2818777), 2022-07-30
Supplement: f1 [file 2818777.f1.pdf]

A

DLL4

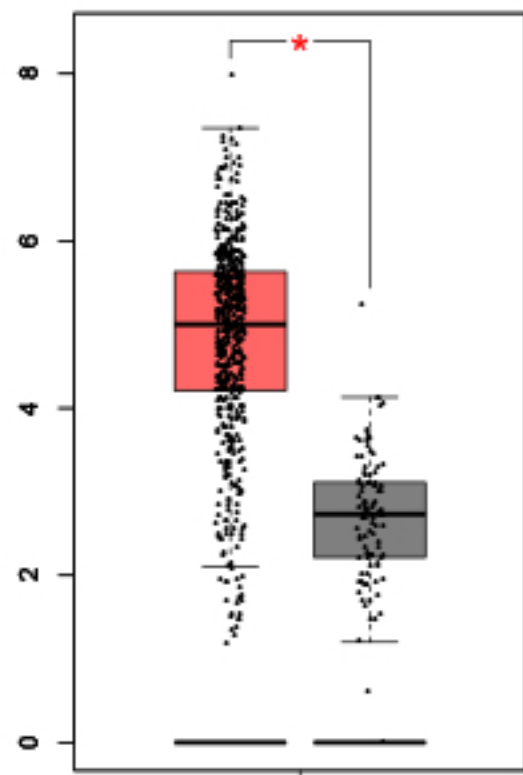

KIRC  
(num(T)=523; num(N)=100)

B

NOTCH4

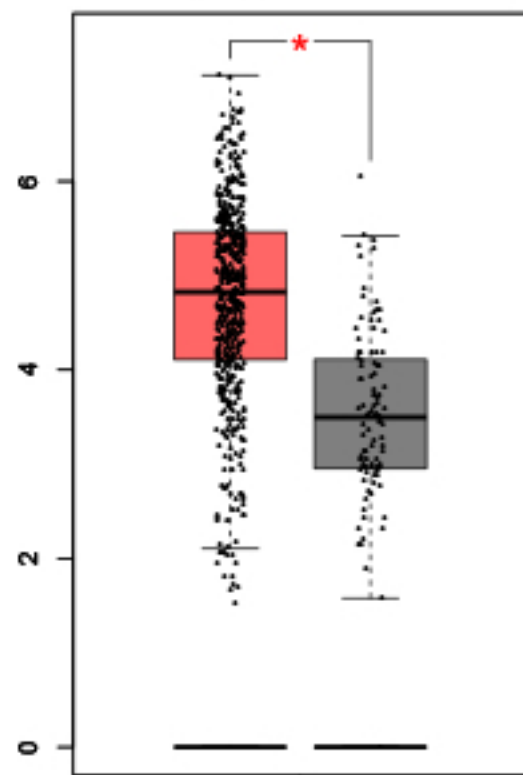

KIRC  
(num(T)=523; num(N)=100)

C

FLT1

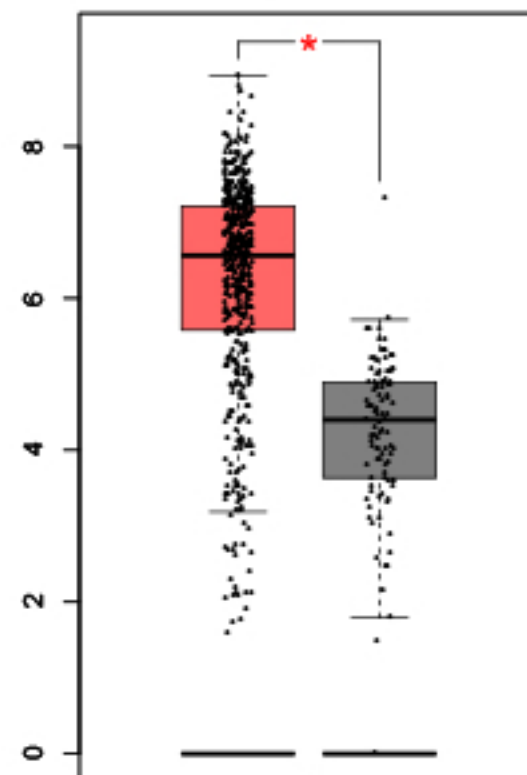

KIRC  
(num(T)=523; num(N)=100)

D

CDH5

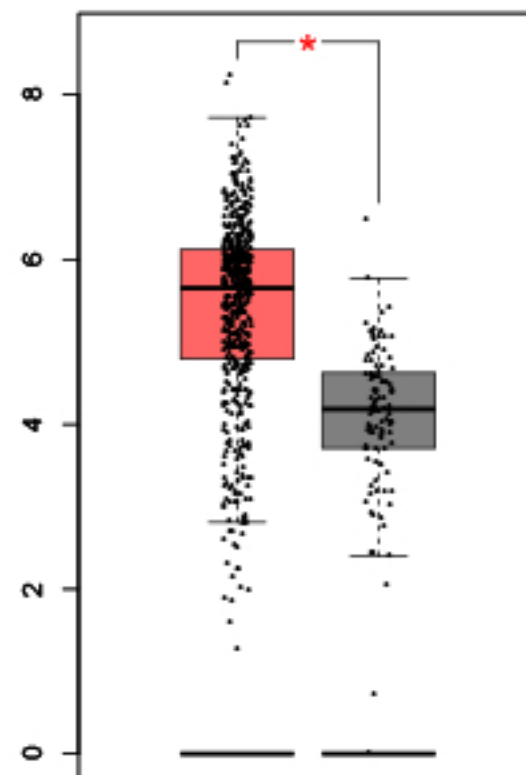

KIRC  
(num(T)=523; num(N)=100)

E

PECAM1

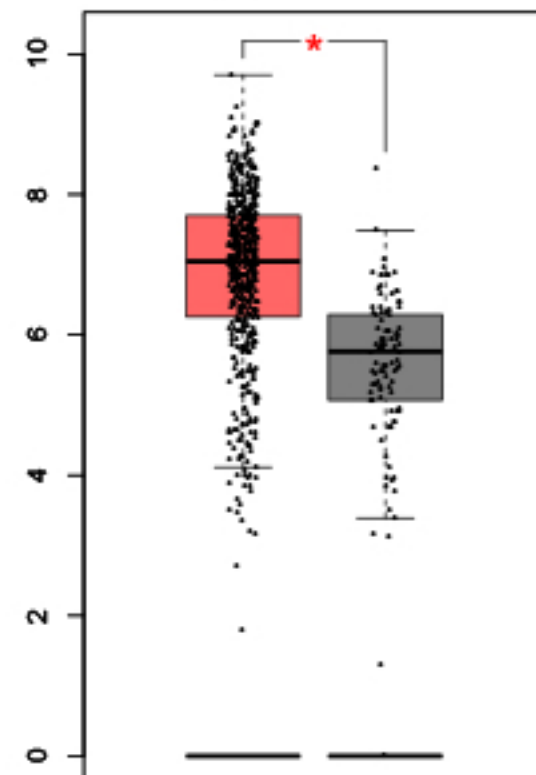

KIRC  
(num(T)=523; num(N)=100)
