# Supplementary material for: Identification of Pathologic Grading-Related Genes Associated with Kidney Renal Clear Cell Carcinoma
Source: Hindawi journal article supplement (doi:10.1155/2022/2818777), 2022-07-30

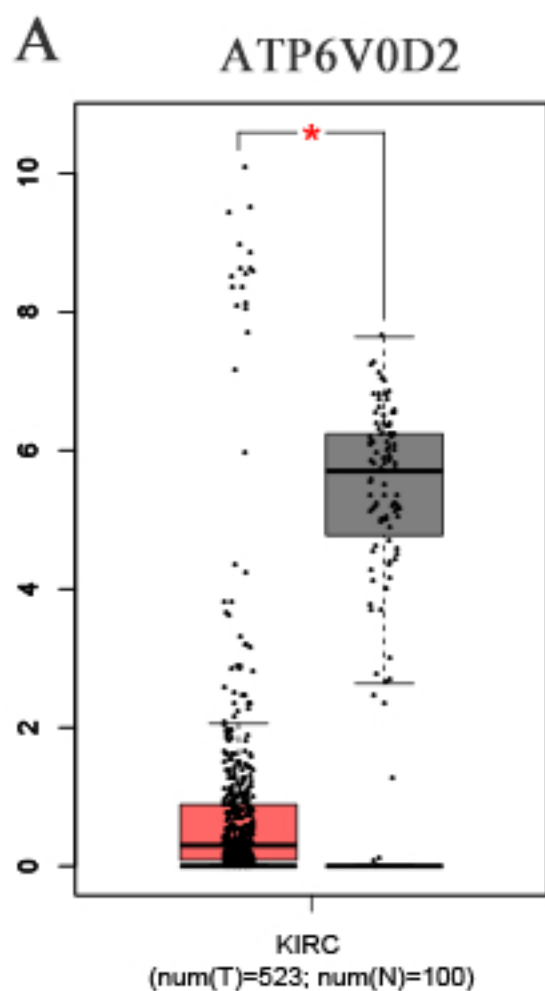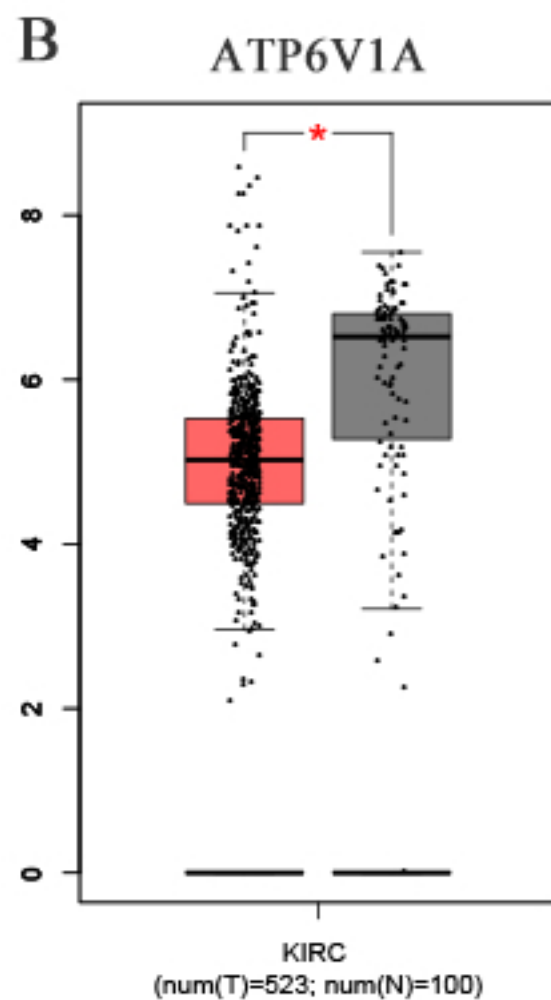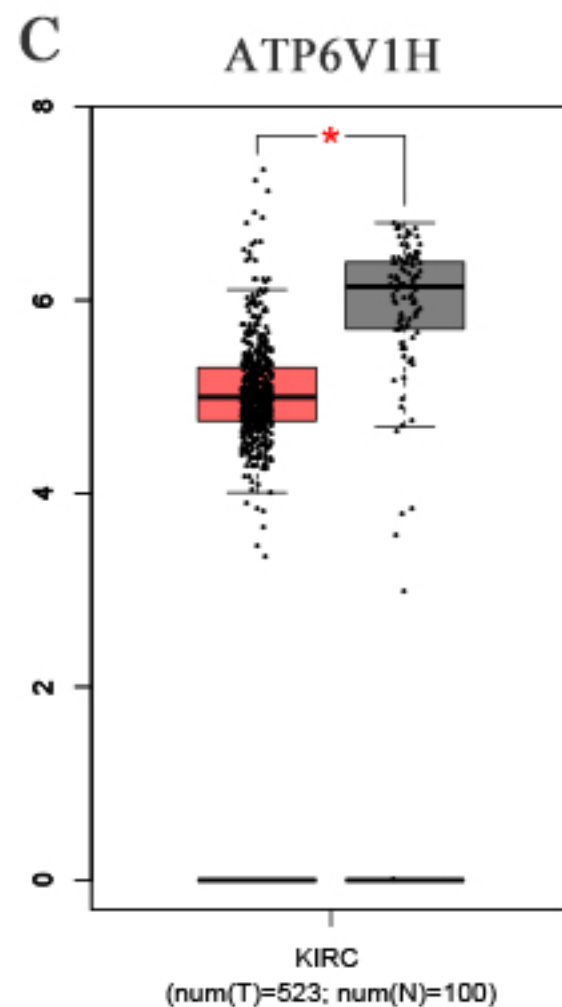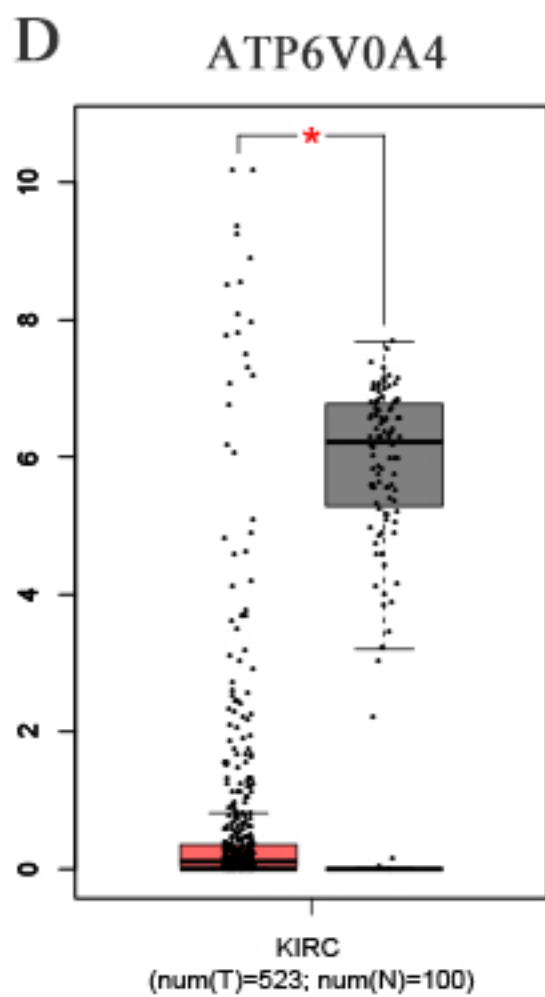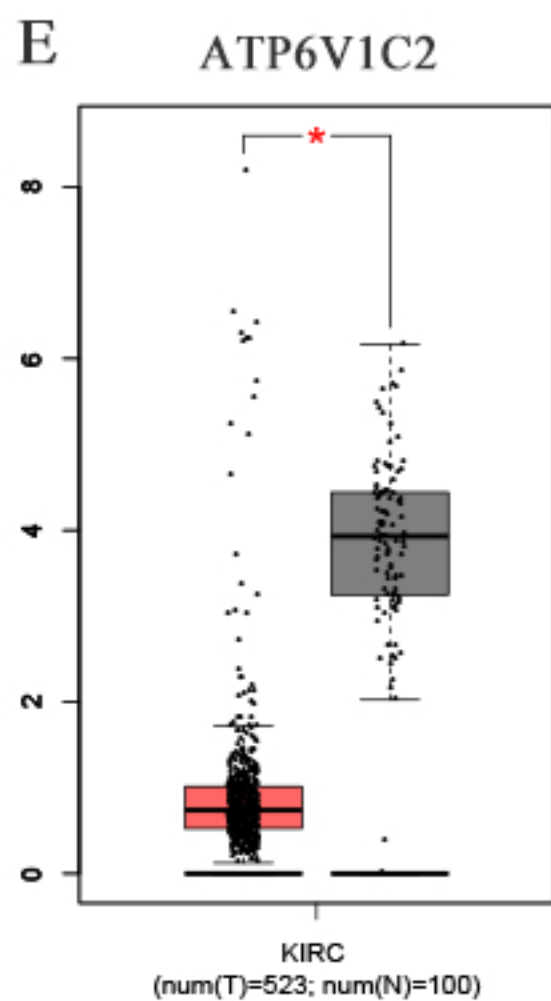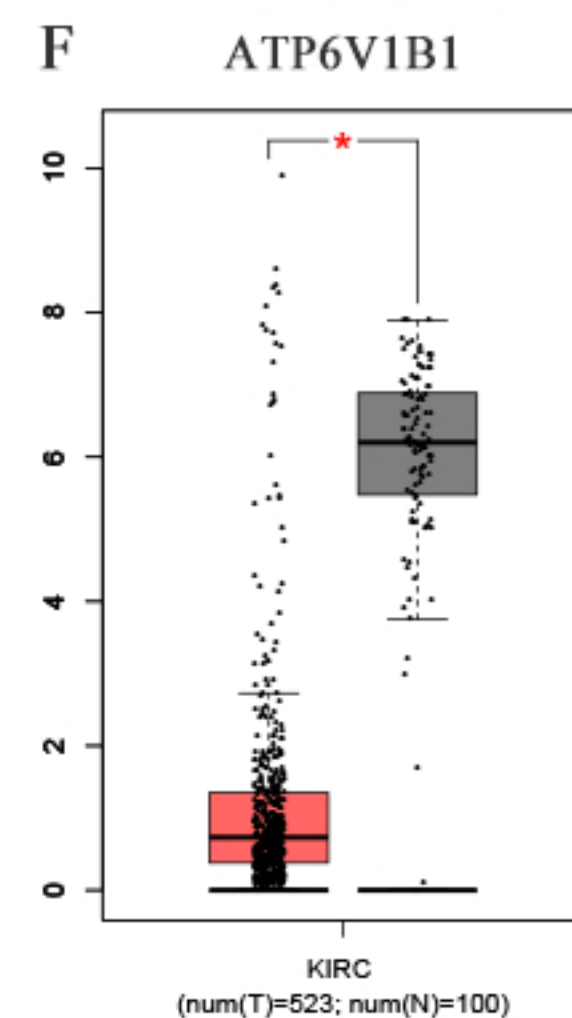

Supplement: f3 [file 2818777.f3.pdf]
